# Supplementary material
Source: PubMed Central journal article supplement (PMC3055733)

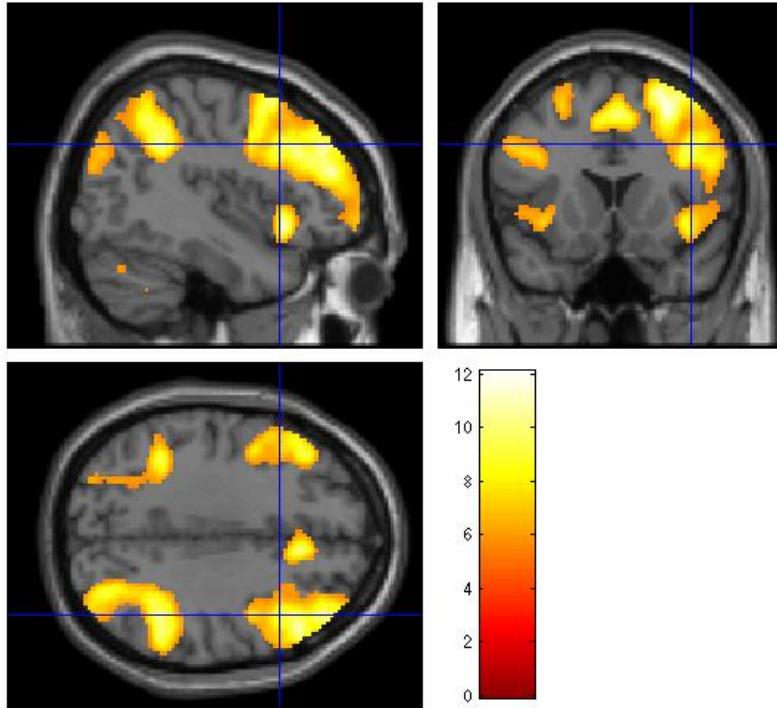

Supplement: npp2010210x1.pdf [file npp2010210x1.pdf]

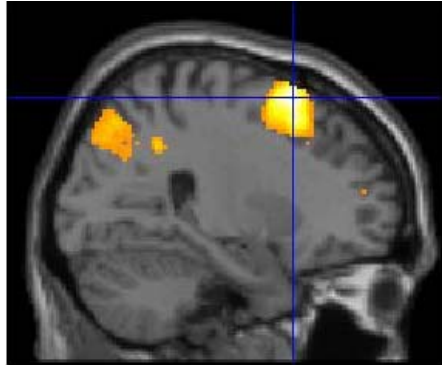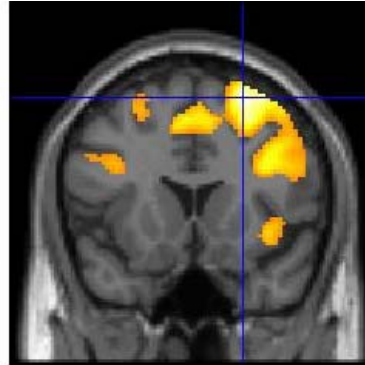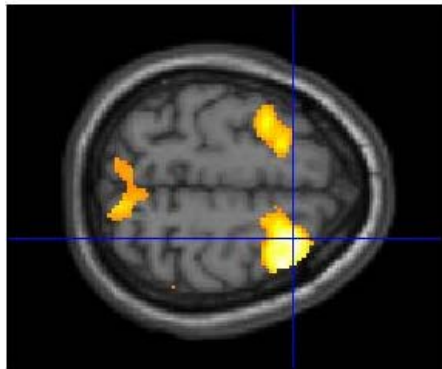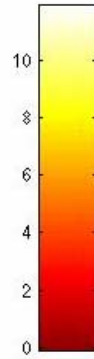

Supplement: npp2010210x2.pdf [file npp2010210x2.pdf]

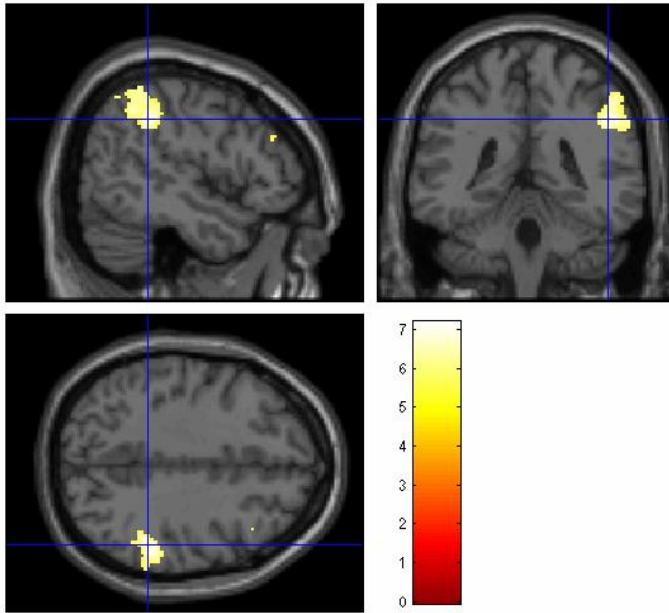

Supplement: npp2010210x3.pdf [file npp2010210x3.pdf]

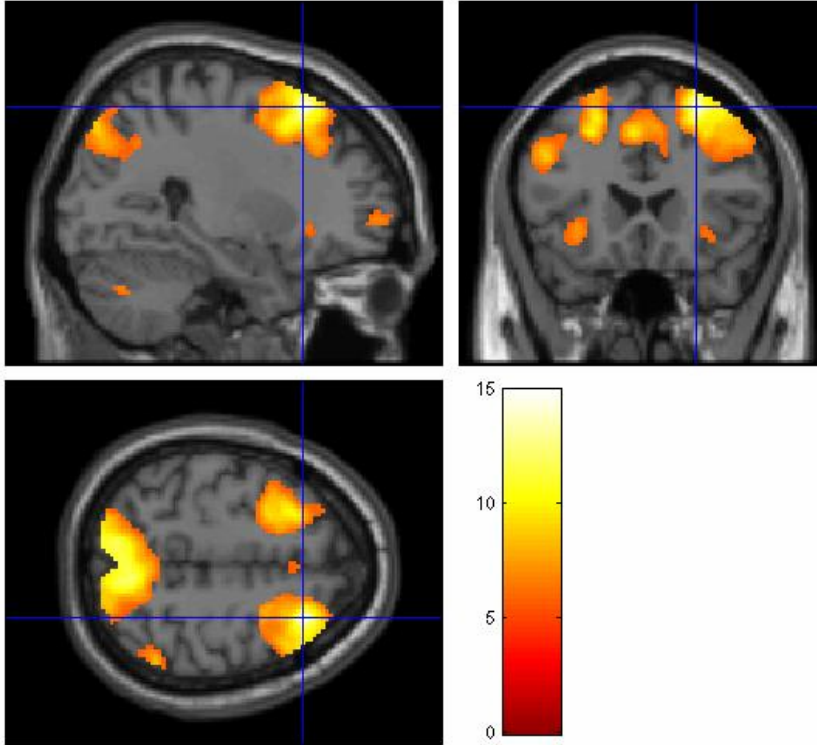

Supplement: npp2010210x4.pdf [file npp2010210x4.pdf]
